# Supplementary material for: Incorporation of a Z-scheme AgI/Ag6Si2O7 heterojunction to PET fabric for efficient and repeatable photocatalytic dye degradation
Source: Royal Society of Chemistry journal article supplement (doi:10.1039/d2nj04168e), 2022-01-01
Supplement: d2nj04168e1.pdf [file d2nj04168e1.pdf]

## Supplementary data

### **Incorporation of a Z-scheme AgI/Ag<sub>6</sub>Si<sub>2</sub>O<sub>7</sub> heterojunction to PET fabric for efficient and repeatable photocatalytic dye degradation**

Lili Wang<sup>1</sup>, Lei Chen<sup>1</sup>, Mengyao Tang<sup>1</sup>, Shoujie Jiang<sup>1,2</sup>, Dawei Gao<sup>1</sup> \*

1 College of Textiles and Clothes, Yancheng Institute of Technology, Yancheng, 224051, China

2 School of Textile Science and Engineering, Xi'an Polytechnic University, Xi'an 710048, China

*Corresponding author:*

gaodawei@ycit.edu.cn (D. Gao)

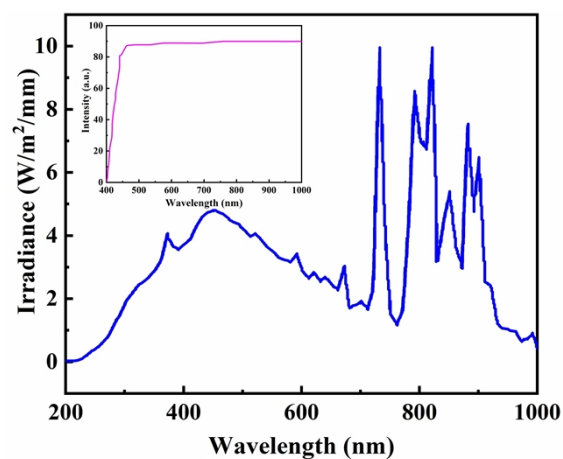

**Figure S1** Xe spectrum produced by Xenon lamp and transmittance of the cut-off film (Inserted).

**Figure S2** SEM image of PET.

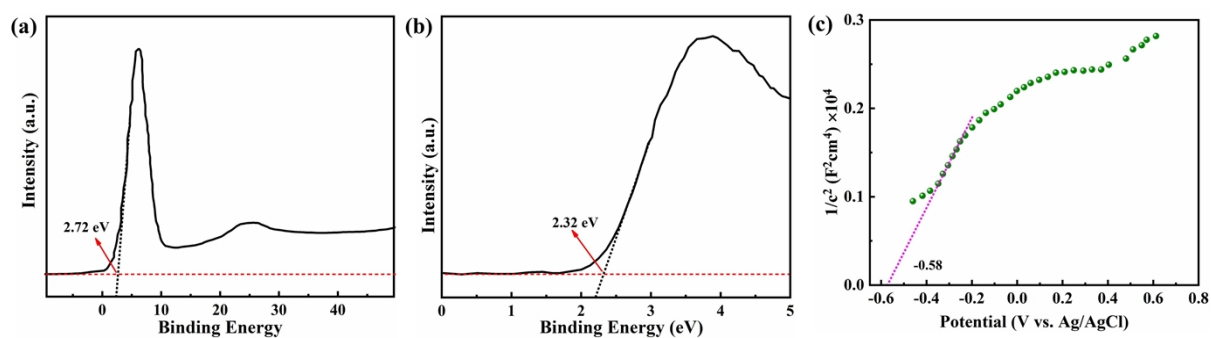

**Figure S3** Valence band XPS spectra of  $\text{Ag}_6\text{Si}_2\text{O}_7/\text{PET}$  (a) and  $\text{AgI}/\text{PET}$  (b), Mott-Schottky plots of  $\text{AgI}/\text{PET}$  (c).

Figure S3 showed that the VB of  $\text{Ag}_6\text{Si}_2\text{O}_7$  was 2.72 V vs NHE and its CB can be calculated to be 1.44 V vs NHE (Figure S3a). The band gap structure of  $\text{AgI}$  was first

determined through XPS spectra of valence band (Figure S3b) and Mott-Schottky plots (Figure S3c). Positive slopes for Mott-Schottky plots indicated that AgI verified n-type semiconductor characteristics. Through the extrapolation of the x intercept in the Mott-Schottky curves, the flat-band potential of AgI could be evaluated to be -0.38 V (vs NHE). The valence XPS spectra could be used to check the energy gap from Fermi level ( $E_f$ ) to the valence band top of semiconductors. The valence band top positions of AgI was 2.32 eV below the  $E_f$ . And the  $E_f$  was close to flatband potential for n-type semiconductor. Combined with the  $E_g$  value, the VB and CB of AgI was 1.94 eV and -0.76 eV, respectively.”

**Figure S4** Photodegradation of MO, RhB and PhOH of AgI/Ag<sub>6</sub>Si<sub>2</sub>O<sub>7</sub>/PET(5) under visible-light irradiation.

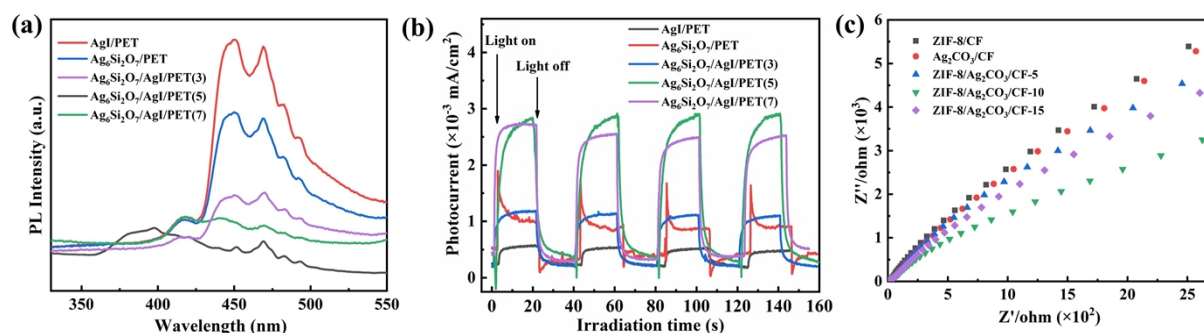

**Figure S5** The PL spectra (a), transient photocurrent response (b) and EIS plots (c) of the as-prepared samples.

**Figure S6** Nitrogen adsorption-desorption isotherm of  $\text{Ag}_6\text{Si}_2\text{O}_7/\text{PET}$ ,  $\text{AgI}/\text{PET}$  and  $\text{AgI}/\text{Ag}_6\text{Si}_2\text{O}_7/\text{PET}(5)$ .

**Table S1** BET surface ares and pore size of  $\text{Ag}_6\text{Si}_2\text{O}_7/\text{PET}$ ,  $\text{AgI}/\text{PET}$  and  $\text{AgI}/\text{Ag}_6\text{Si}_2\text{O}_7/\text{PET}(5)$

| Samples                                                     | $S_{\text{BET}}$ ( $\text{m}^2/\text{g}$ ) | Pore Volume ( $\text{cm}^3/\text{g}$ ) | Pore size (nm) |
|-------------------------------------------------------------|--------------------------------------------|----------------------------------------|----------------|
| $\text{Ag}_6\text{Si}_2\text{O}_7/\text{PET}$               | 1.754                                      | 0.004                                  | 3.432          |
| $\text{AgI}/\text{PET}$                                     | 28.347                                     | 0.115                                  | 1.466          |
| $\text{AgI}/\text{Ag}_6\text{Si}_2\text{O}_7/\text{PET}(5)$ | 5.746                                      | 0.022                                  | 1.849          |

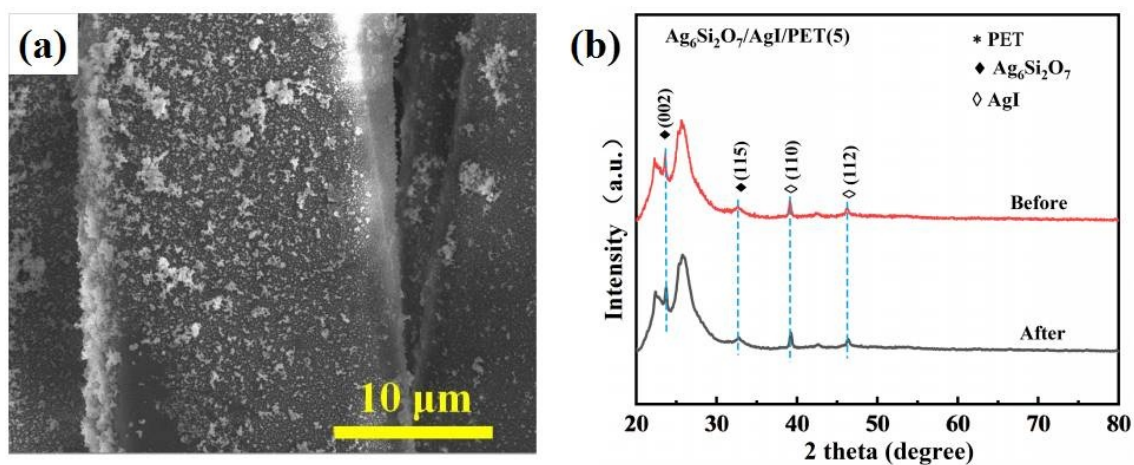

**Figure S7** SEM image (a) and XRD patterns (b) of  $\text{AgI}/\text{Ag}_6\text{Si}_2\text{O}_7/\text{PET}(5)$  after 5 cycles' photocatalysis.

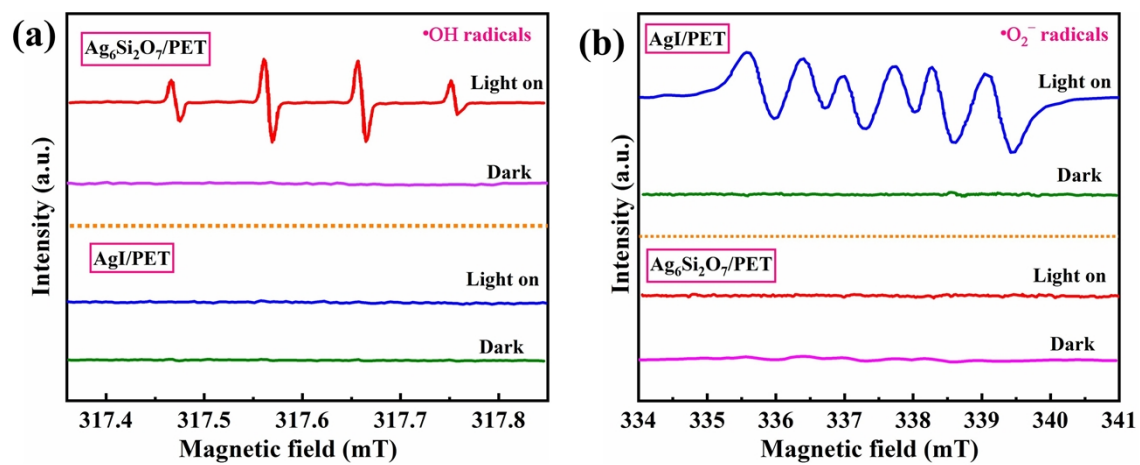

**Figure S8** The ESR signals of  $\cdot\text{OH}$  (a) and  $\cdot\text{O}_2^-$  (b) of  $\text{AgI}/\text{Ag}_6\text{Si}_2\text{O}_7/\text{PET}$  and  $\text{AgI}/\text{PET}$ .
